# Supplementary material for: New tools provide a second look at HDV ribozyme structure, dynamics and cleavage
Source: PubMed Central journal article supplement (PMC4227795; doi:10.1093/nar/gku992), 2014-10-17
Supplement: supp_gku992_nar-01529-r-2014-File013.pdf [file supp_gku992_nar-01529-r-2014-File013.pdf]

SUPPLEMENTARY INFORMATION For

## New Tools Provide a Second Look at HDV Ribozyme Structure, Dynamics, and Cleavage

Gary J. Kapral<sup>1,4</sup>, Swati Jain<sup>1,2,4</sup>, Jonas Noeske<sup>3</sup>, Jennifer A. Doudna<sup>3</sup>, David C. Richardson<sup>1</sup> and Jane S. Richardson<sup>1,\*</sup>.

<sup>1</sup> Department of Biochemistry, Duke University, Durham NC 27710, USA

<sup>2</sup> Program in Computational Biology and Bioinformatics, Duke University, Durham NC 27710, USA

<sup>3</sup> Department of Molecular and Cell Biology, University of California Berkeley, Berkeley, CA 94720, USA

<sup>4</sup> The authors wish it to be known that, in their opinion, the first two authors should be regarded as joint First Authors.

\* To whom correspondence should be addressed. Tel: 1-919-684-6010; Fax: 1-919-680-6010; Email:

[jsr@kinemage.biochem.duke.edu](mailto:jsr@kinemage.biochem.duke.edu)

### S1 Outlier markup for the cleaved and C75U-inhibited HDV Structures

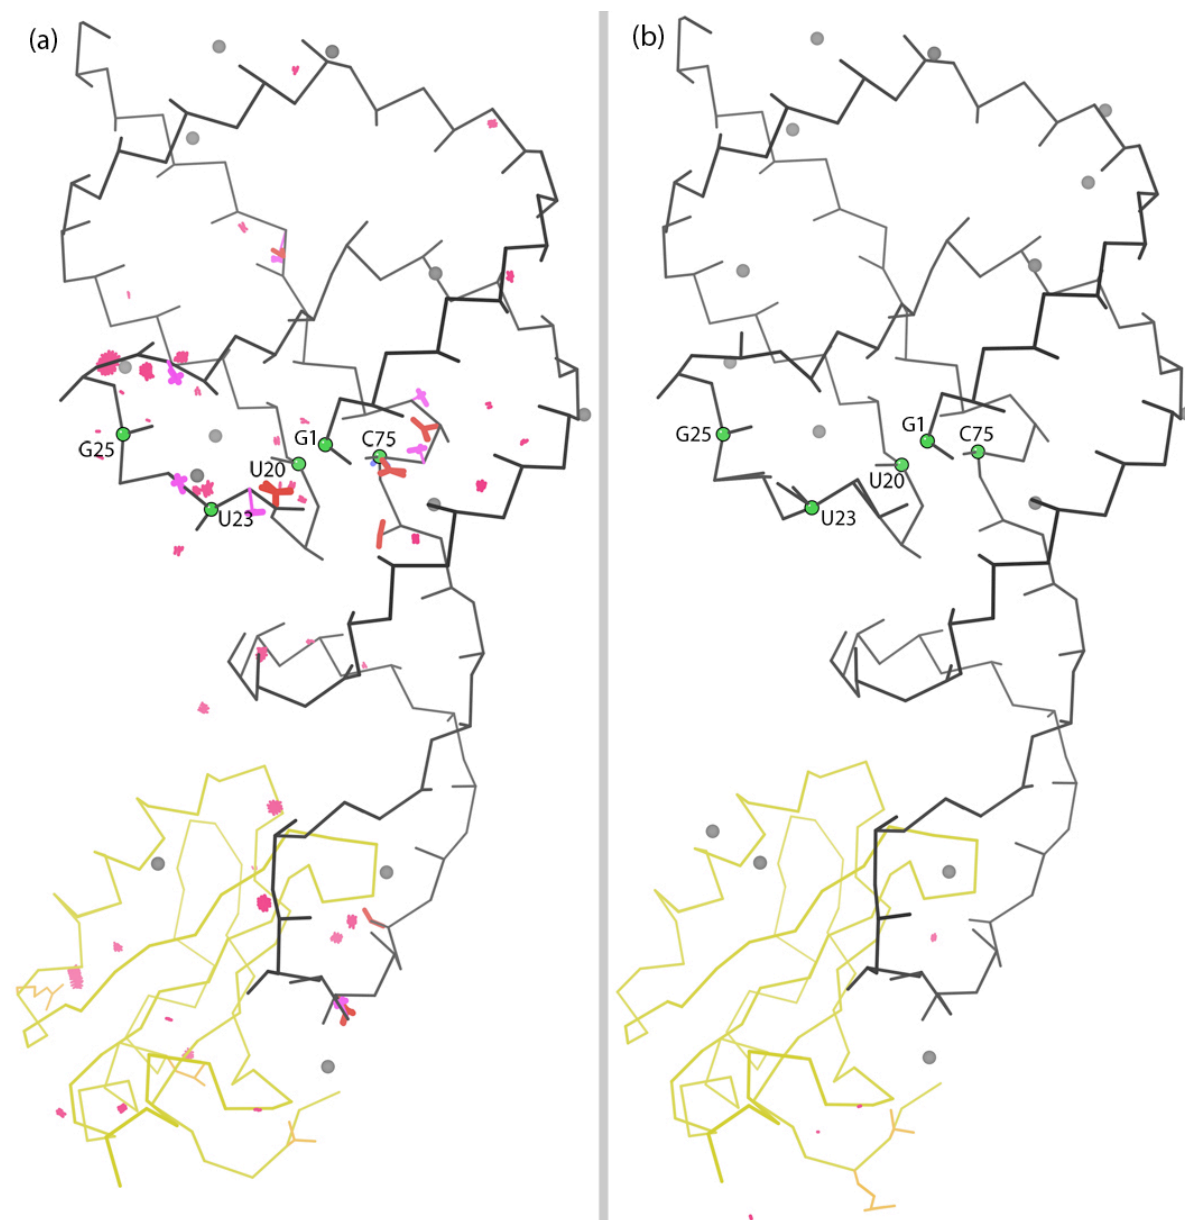

Figure S1: MolProbity (1) style outlier markup for the cleaved HDV Ribozyme structure. The RNA virtual backbone is in black and the protein main chain is in yellow. Here and in Figure S2, the outliers are marked as follows: steric clashes as pink spikes, ribose pucker outliers as magenta crosses, bond-length outliers as red and blue spirals, bond-angle outliers as red and blue fans, and rotamer outliers as gold side chains. (a) The original structure (PDB ID: 1CX0) (2) and (b) The rebuilt structure (PDB ID: 4PR6).

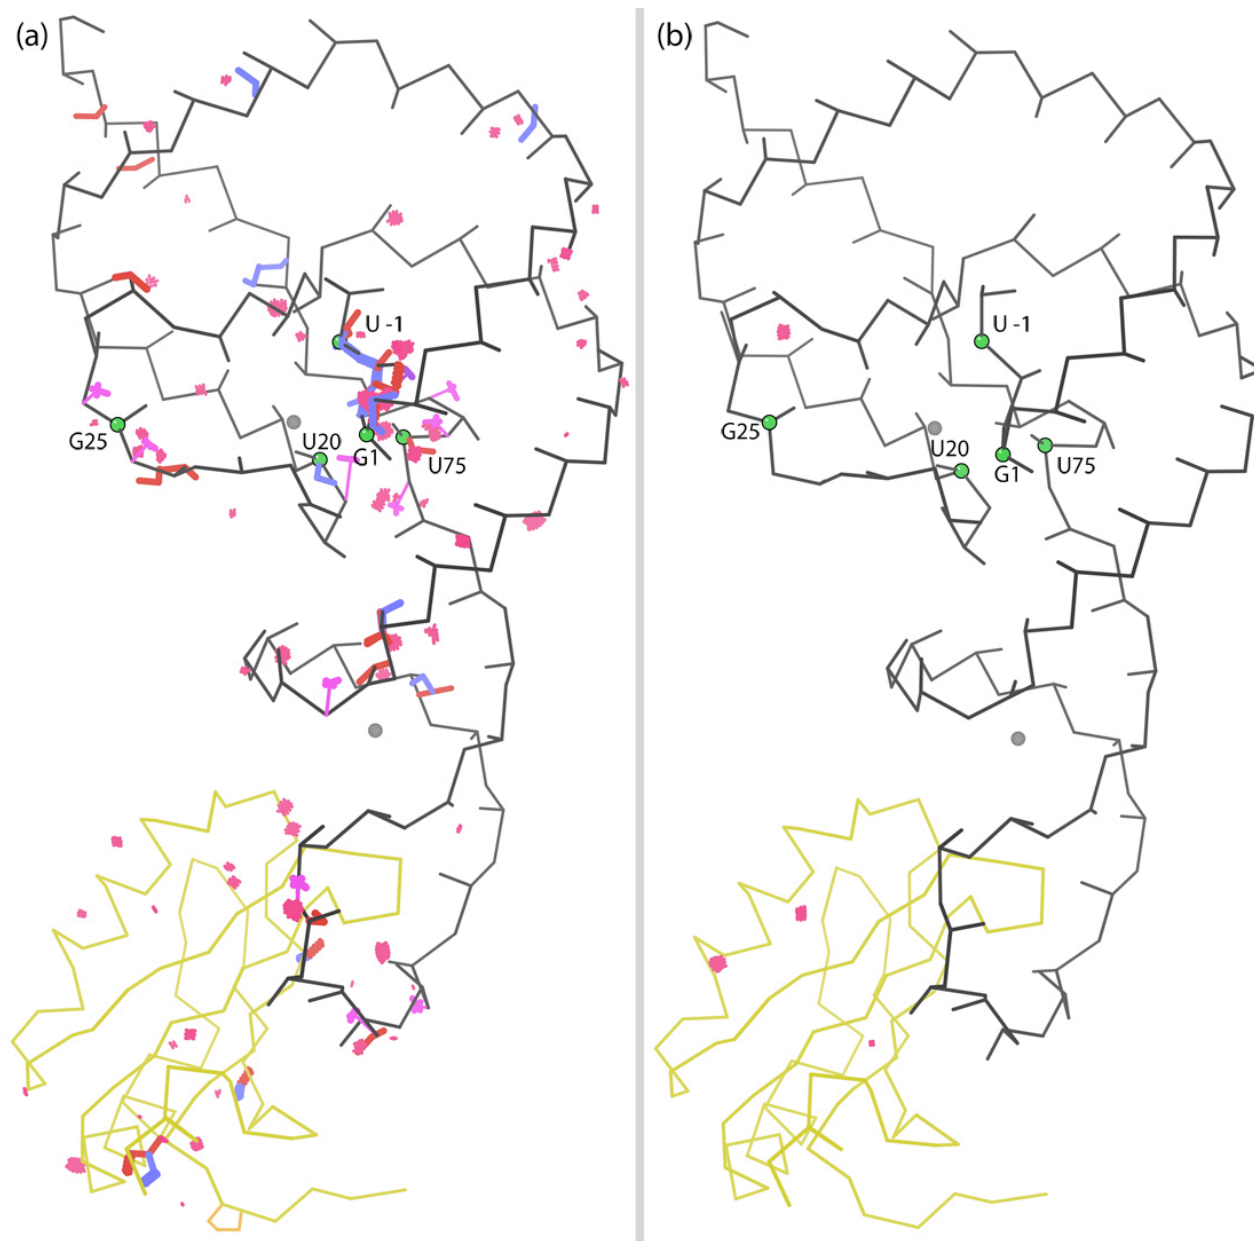

Figure S2: MolProbity (1) style outlier markup for the C75U-inhibited HDV Ribozyme structure. The RNA virtual backbone is in black and the protein main chain is in yellow. (a) The original structure (PDB ID: 1VC7) (3) and (b) The rebuilt structure (PDB ID: 4PRF).

## S2 Details on Structure Validation

To assess model-to-data match we used  $R$ ,  $R_{\text{free}}$ , and difference electron density. To assess model quality, we used MolProbity (version 4.1) (1), a structure-validation web service that evaluates many features of RNA and protein models, or the equivalent functionality within PHENIX (4, 5). MolProbity uses Reduce (6) to add hydrogen atoms to the model, and Probe (7) to carry out all-atom contact analysis. Atomic overlaps of  $>0.4\text{\AA}$  represent impossible steric clashes, and are reported both individually, and as 'clashscore', calculated as the number of clashes per 1000 atoms. The model is assigned a percentile for the clashscore, relative to structures of similar resolution. MolProbity also analyses bond-lengths and bond-angles, and flags any residues that deviate by  $>4\sigma$  from the expected value as outliers. For protein models, the backbone is evaluated for Ramachandran outliers and deviations in  $C\beta$  position. Protein side chains are evaluated for rotamer outliers. In addition Asn, Gln, and His side-chain ends are analysed, since they are often fit  $180^\circ$  backwards, and are flipped if necessary. The protein chain is given an overall MolProbity score (along with its percentile) taking into account the above-mentioned validation criteria.

Apart from geometry and all-atom contact analysis, MolProbity evaluates RNA chains for ribose pucker outliers and RNA backbone conformers. The ribose sugar in RNA almost always adopts one of the two pucker conformations: C3'-endo or C2'-endo. The ranges for the value of the  $\delta$  dihedral angle ( $C5'-C4'-C3'-O3'$ ) are:  $60^\circ$ - $105^\circ$  and  $125^\circ$ - $165^\circ$  for C3'-endo and C2'-endo pucker respectively. To validate the modelled pucker for a particular residue, a perpendicular is dropped from the 3' phosphorous atom to the extended line of the glycosidic bond ( $C1'-N1/N9$ ) vector. The length of the perpendicular is shown to be highly co-related with the pucker of the ribose ring:  $>2.9\text{\AA}$  for C3'-endo and  $<2.9\text{\AA}$  for C2'-endo pucker (8). If the length of the perpendicular and the value of the  $\delta$  angle indicate different puckers, the residue is flagged as a ribose pucker outlier. In addition, the residues are also flagged if their  $\epsilon$  dihedral angle ( $C4'-C3'-O3'-P_{+1}$ ) value is outside the preferred range ( $155^\circ$ - $310^\circ$ ).

The sugar-phosphate backbone of the RNA chain is shown to be rotameric and most likely adopts one of the 54 recognized backbone conformers (9, 10). These backbone conformers represent favourable conformations of the sugar-to-sugar unit of the RNA backbone, called a *suite*. Each suite consists of seven dihedral angles:  $\delta$ ,  $\epsilon$ ,  $\zeta$  of the previous residue and  $\alpha$ ,  $\beta$ ,  $\gamma$ ,  $\delta$  of the current residue. Distinct clusters in seven dimensional space were identified as distinct backbone conformers, and were given a two-character name, each character representing the conformation of one of the hemi-nucleotides. As an example, **1a** represents the conformation of the RNA backbone in a standard A-form helix, and **1[** is the most common conformation adopted by an intercalation motif. For RNA backbone analysis in MolProbity and PHENIX, an automated program called Suitename analyses the backbone dihedral angles in the RNA chain and assigns a backbone conformer to each suite, or flags it as an outlier (denoted as !!) if it does not fall under any of the 54 recognized backbone conformers. The first step in this process is to place the suite in one of the 12 bins for  $\delta$ ,  $\delta\gamma$  angles ( $C3'$  or  $C2'$  for  $\delta$  angles and **minus**, **plus**, or **trans** for  $\gamma$  angle), and next to assign a particular backbone conformer to the suite within that bin. A value called *suiteness* is assigned to each suite (a number between 0 and 1, 0 for outlier suites), which provides a measure of how close it is to the centre of the backbone conformer cluster. The suites are also flagged as 'triaged' if any of the seven dihedral angles fall outside the preferred range of values (10).

## S3 Backbone corrections in the cleaved and C75U-inhibited structures of the HDV ribozyme

The original cleaved structure of the HDV ribozyme (PDB ID: 1CX0) (2) has eight ribose pucker outliers (shown in red in Table. S1) and 16 unrecognized backbone conformations. The rebuilt structure (PDB ID: 4PR6) has no ribose pucker outliers, and the number of unrecognized backbone conformations was reduced from 16 to 9. Table. S1 shows the backbone conformers for the original and rebuilt cleaved structure. The pucker corrections were particularly impressive—hand refits and the use of RNABC were initially successful in correcting only one of these ribose puckers, residue 152, refitting the C3'-endo pucker as C2'-endo, while the other seven ribose puckers were each corrected to C2'-endo pucker only by using ERRASER. Correcting these ribose pucker outliers resulted in four suites changing to recognized backbone conformers: **1b** for 122, **1[** for 152, **2o** for 163, and **6p** for 164. The other three corrected ribose pucker outliers, 123, 127, and 167, remain outlier suites but have an improved fit to the electron density and no longer exhibit geometry outliers and steric clashes. This strategy also allowed six of the unrecognized backbone conformations to adopt known valid conformers. In total, 12 suites were changed from the original: seven of these are corrections from !! in the original to valid conformers, one is a change from **7d** to !!, and the other three change to different valid conformers. Some residues change more than once

during the process; for instance residue 122 goes from **1f** to **1t** to **1b**, depending on whether it has been through the full ERRASER protocol or just PHENIX refinement. The only residue to be changed into an apparent outlier is 110, which goes from **7d** to **!!**. Interestingly, the new conformation appears to be experimentally and sterically valid, with no geometry outliers, no clashes, and good fit to density. Thus, it represents a region of conformational space that is rarely sampled in existing structures, but which may be confirmed by future data to establish a new official backbone conformer.

Table S1: Backbone conformers for the cleaved HDV ribozyme, the original (PDB ID: 1CX0) and the rebuilt (PDB ID: 4PR6) structures. Residues are numbered according to the PDB file. Residues colored in red were ribose pucker outliers in the original structure, that were corrected in the rebuilt structure, leading to change in the backbone conformers for suite i and i+1.

| PDB Residue Number | PDB ID: 1CX0               |                    |           | PDB ID: 4PR6               |                    |           |
|--------------------|----------------------------|--------------------|-----------|----------------------------|--------------------|-----------|
|                    | $\delta_{i-1}\delta_i$ bin | Backbone Conformer | suiteness | $\delta_{i-1}\delta_i$ bin | Backbone Conformer | suiteness |
| 101                | Incomplete                 | —                  | 0.00      | Incomplete                 | —                  | 0.00      |
| 102                | 33 p                       | 1a                 | 0.881     | 33 p                       | 1a                 | 0.877     |
| 103                | 33 p                       | 1a                 | 0.930     | 33 p                       | 1a                 | 0.941     |
| 104                | 33 p                       | 1a                 | 0.877     | 33 p                       | 1a                 | 0.922     |
| 105                | 33 p                       | 1a                 | 0.935     | 33 p                       | 1a                 | 0.945     |
| 106                | 33 p                       | 1a                 | 0.884     | 33 p                       | 1a                 | 0.930     |
| 107                | 33 p                       | 1a                 | 0.898     | 33 p                       | 1a                 | 0.785     |
| 108                | 33 p                       | 1a                 | 0.845     | 33 p                       | 1a                 | 0.906     |
| 109                | 33 p                       | 1a                 | 0.860     | 33 p                       | 1a                 | 0.938     |
| 110                | 33 p                       | 7d                 | 0.426     | 33 t                       | !!                 | 0.00      |
| 111                | 33 p                       | 1a                 | 0.700     | 33 p                       | 1a                 | 0.789     |
| 112                | 33 p                       | 1a                 | 0.905     | 33 p                       | 1a                 | 0.947     |
| 113                | 33 p                       | 1a                 | 0.929     | 33 p                       | 1a                 | 0.842     |
| 114                | 33 p                       | 1a                 | 0.661     | 33 p                       | 1a                 | 0.880     |
| 115                | 33 p                       | 1a                 | 0.806     | 33 p                       | 1a                 | 0.836     |
| 116                | 33 p                       | 1a                 | 0.947     | 33 p                       | 1a                 | 0.786     |
| 117                | 33 p                       | 1a                 | 0.889     | 33 p                       | 1a                 | 0.557     |
| 118                | 33 p                       | 1a                 | 0.921     | 33 p                       | 1a                 | 0.925     |
| 119                | 33 p                       | 1a                 | 0.847     | 33 p                       | 1a                 | 0.964     |
| 120                | 33 p                       | 1a                 | 0.197     | 32 p                       | 1b                 | 0.837     |
| 121                | 33 p                       | 3d                 | 0.122     | 23 p                       | 8d                 | 0.411     |
| 122                | 33 t                       | 1f                 | 0.568     | 32 p                       | 1b                 | 0.582     |
| 123                | Triaged                    | !!                 | 0.00      | 22 p                       | !!                 | 0.00      |
| 124                | Triaged                    | !!                 | 0.00      | Triaged                    | !!                 | 0.00      |
| 125                | Triaged                    | !!                 | 0.00      | 23 t                       | 6n                 | 0.612     |
| 126                | 33 t                       | !!                 | 0.00      | 33 t                       | !!                 | 0.00      |
| 127                | Triaged                    | !!                 | 0.00      | 32 p                       | !!                 | 0.00      |
| 128                | Triaged                    | !!                 | 0.00      | 23 m                       | 0k                 | 0.085     |
| 129                | 33 p                       | 1a                 | 0.636     | 33 p                       | 1a                 | 0.740     |
| 130                | 33 p                       | 1a                 | 0.691     | 33 p                       | 1a                 | 0.936     |
| 131                | 33 p                       | 3d                 | 0.559     | 33 p                       | 3d                 | 0.357     |
| 132                | 33 p                       | 1a                 | 0.915     | 33 p                       | 1a                 | 0.960     |
| 133                | 33 p                       | 1a                 | 0.830     | 33 p                       | 1a                 | 0.706     |
| 134                | 33 p                       | 1a                 | 0.916     | 33 p                       | 1a                 | 0.790     |
| 135                | 33 p                       | 1a                 | 0.843     | 33 p                       | 1a                 | 0.701     |
| 136                | 33 p                       | 1a                 | 0.923     | 33 p                       | 1a                 | 0.890     |
| 137                | 33 p                       | 1a                 | 0.943     | 33 p                       | 1a                 | 0.888     |
| 138                | 33 p                       | 1a                 | 0.620     | 33 p                       | 1a                 | 0.728     |
| 139                | 33 p                       | 1a                 | 0.851     | 33 p                       | 1a                 | 0.852     |

|     |         |    |        |      |    |       |
|-----|---------|----|--------|------|----|-------|
| 140 | 33 p    | 1a | 0.978  | 33 p | 1a | 0.897 |
| 141 | 32 t    | !! | 0.00   | 32 t | !! | 0.00  |
| 142 | 23 p    | 4g | 0.054  | 23 p | 4g | 0.010 |
| 143 | 33 p    | 1a | 0.814  | 33 p | 1a | 0.721 |
| 144 | 33 p    | 1a | 0.895  | 33 p | 1a | 0.844 |
| 145 | 33 p    | 1a | 0.918  | 33 p | 1a | 0.961 |
| 146 | 33 p    | 1a | 0.88   | 33 p | 1a | 0.932 |
| 147 | 33 p    | 1a | 0.914  | 33 p | 1a | 0.784 |
| 148 | 33 p    | 1a | 0.948  | 33 p | 1a | 0.769 |
| 149 | 33 p    | 1a | 0.917  | 33 p | 1a | 0.802 |
| 150 | 32 p    | 1[ | 0.771  | 32 p | 1[ | 0.853 |
| 151 | 23 p    | 6g | 0.422  | 23 p | 6g | 0.321 |
| 152 | 33 p    | 1m | 0.209  | 32 p | 1[ | 0.638 |
| 153 | Triaged | !! | 0.00   | 23 p | 0a | 0.626 |
| 154 | 33 p    | 1a | 0.0815 | 33 p | 1a | 0.724 |
| 155 | 32 p    | !! | 0.00   | 32 p | !! | 0.00  |
| 156 | Triaged | !! | 0.00   | 23 p | 4g | 0.574 |
| 157 | 33 p    | 1a | 0.881  | 33 p | 1a | 0.922 |
| 158 | 33 t    | !! | 0.00   | 33 t | !! | 0.00  |
| 159 | 33 p    | 1a | 0.855  | 33p  | 1a | 0.941 |
| 160 | 33 p    | 1a | 0.956  | 33p  | 1a | 0.886 |
| 161 | 33 p    | 1a | 0.932  | 33p  | 1a | 0.971 |
| 162 | 32 p    | 1b | 0.698  | 33p  | 1b | 0.692 |
| 163 | 23 m    | !! | 0.00   | 22 m | 2o | 0.281 |
| 164 | Triaged | !! | 0.00   | 22 p | 6p | 0.508 |
| 165 | Triaged | !! | 0.00   | 23 p | 2a | 0.760 |
| 166 | 33 p    | 1a | 0.541  | 33 p | 1a | 0.146 |
| 167 | Triaged | !! | 0.00   | 32 t | !! | 0.00  |
| 168 | Triaged | !! | 0.00   | 23 t | 4n | 0.303 |
| 169 | 33 p    | 1a | 0.850  | 33 p | 1a | 0.981 |
| 170 | 33 p    | 1a | 0.931  | 33 p | 1a | 0.743 |
| 171 | 33 p    | 1a | 0.887  | 33 p | 1a | 0.949 |
| 172 | 33 p    | 1a | 0.795  | 33 p | 1a | 0.742 |

The original C75U-inhibited structure of the HDV ribozyme (PDB ID: 1VC7) (3) has 12 ribose pucker outliers (shown in red in Table. S2) and 23 unrecognized backbone conformations. All geometry and ribose pucker outliers were corrected in the rebuilt structure (PDB ID: 4PRF), including 10 ribose puckers that were misfit as either C3'-endo or O4'-endo, and were corrected to C2'-endo. The number of unrecognized backbone conformations reduced from 23 to 11. Table. S2 shows the backbone conformers for the original and rebuilt structure. The pucker corrections led to significant changes in the backbone conformers for a number of suites. 11 suites changed from !! to a recognized backbone conformer: **1g** or **101**, **1b** for 120, **8d** for 121, **1[** for 150, **6g** for 151, **0a** for 153, **5p** for 155, **4g** for 156, **2o** for 163, **6p** for 164, and **2a** for 165. Suite 152 changed from one intercalation conformer, **1m**, to another, **1[**, and suite 162 changed from **1a** to **1b** as the ribose pucker for both these residues was corrected from C3'-endo to C2'-endo. Suite 141 was incorrectly modelled as **1e**, but after its ribose pucker was corrected, it is now a !!. Residue 127 and 179 were both modelled as C3'-endo and were not flagged as ribose pucker outliers, but after rebuilding, both puckers changed to C2'-endo, as they fit the density better. This resulted in 2 suites moving from one backbone conformer to another: **7d** to **7p** for 127, and **1c** to **4n** for 168.

Table S2: Backbone conformers for the C75U-inhibited HDV ribozyme, the original (PDB ID: 1VC7) and the rebuilt (PDB ID: 4PRF) structures. Residues are numbered according to the PDB file. Residues colored in red were ribose pucker outliers in the original structure, that were corrected in the rebuilt structure, leading to change in the backbone conformers for suite  $i$  and  $i+1$ .

| PDB Residue Number | PDB ID: 1VC7                 |                    |           | PDB ID: 4PRF                 |                    |           |
|--------------------|------------------------------|--------------------|-----------|------------------------------|--------------------|-----------|
|                    | $\delta_i, \delta_{i+1}$ bin | Backbone Conformer | suiteness | $\delta_i, \delta_{i+1}$ bin | Backbone Conformer | suiteness |
| 99                 | Incomplete                   | —                  | 0.00      | Incomplete                   | —                  | 0.00      |
| 100                | Triaged                      | !!                 | 0.00      | 23 t                         | !!                 | 0.00      |
| 101                | 33 t                         | !!                 | 0.00      | 33 p                         | 1g                 | 0.591     |
| 102                | 33 p                         | 1a                 | 0.010     | 33 p                         | 1a                 | 0.615     |
| 103                | 33 p                         | 1a                 | 0.745     | 33 p                         | 1a                 | 0.697     |
| 104                | 33 p                         | 1a                 | 0.689     | 33 p                         | 1a                 | 0.310     |
| 105                | 33 p                         | 1a                 | 0.611     | 33 p                         | 1a                 | 0.802     |
| 106                | 33 p                         | 1a                 | 0.412     | 33 p                         | 1a                 | 0.640     |
| 107                | 33 p                         | 1a                 | 0.629     | 33 p                         | 1a                 | 0.619     |
| 108                | 33 p                         | 1a                 | 0.754     | 33 p                         | 1a                 | 0.835     |
| 109                | 33 p                         | 1a                 | 0.825     | 33 p                         | 1a                 | 0.704     |
| 110                | 33 t                         | !!                 | 0.00      | 33 t                         | !!                 | 0.00      |
| 111                | 33 p                         | 1a                 | 0.661     | 33 p                         | 1a                 | 0.888     |
| 112                | 33 p                         | 1a                 | 0.691     | 33 p                         | 1a                 | 0.829     |
| 113                | 33 t                         | !!                 | 0.00      | 33 t                         | 1c                 | 0.845     |
| 114                | 33 p                         | 1a                 | 0.863     | 33 p                         | 1a                 | 0.822     |
| 115                | 33 p                         | 1a                 | 0.963     | 33 p                         | 1a                 | 0.939     |
| 116                | 33 p                         | 1a                 | 0.795     | 33 p                         | 1a                 | 0.379     |
| 117                | 33 p                         | 1a                 | 0.760     | 33 p                         | 1a                 | 0.649     |
| 118                | 33 p                         | 1a                 | 0.851     | 33 p                         | 1a                 | 0.540     |
| 119                | 33 p                         | 1a                 | 0.935     | 33 p                         | 1a                 | 0.761     |
| 120                | Triaged                      | !!                 | 0.00      | 32 p                         | 1b                 | 0.586     |
| 121                | Triaged                      | !!                 | 0.00      | 23 p                         | 8d                 | 0.328     |
| 122                | 33 p                         | 1c                 | 0.520     | 33 p                         | 1a                 | 0.872     |
| 123                | 33 t                         | !!                 | 0.00      | 32 m                         | !!                 | 0.00      |
| 124                | 33 t                         | !!                 | 0.00      | 22 t                         | !!                 | 0.00      |
| 125                | Triaged                      | !!                 | 0.00      | 22 p                         | !!                 | 0.00      |
| 126                | Triaged                      | !!                 | 0.00      | 23 t                         | !!                 | 0.00      |
| 127                | 33 p                         | 7d                 | 0.033     | 32 p                         | 7p                 | 0.506     |
| 128                | 33 t                         | !!                 | 0.00      | 23 t                         | 6j                 | 0.166     |
| 129                | 33 p                         | 1a                 | 0.839     | 33 p                         | 1a                 | 0.800     |
| 130                | 33 p                         | 1a                 | 0.874     | 33 p                         | 1a                 | 0.949     |
| 131                | 33 t                         | !!                 | 0.00      | 33 t                         | !!                 | 0.00      |
| 132                | 33 p                         | 1a                 | 0.750     | 33 p                         | 1a                 | 0.883     |
| 133                | 33 p                         | 1a                 | 0.885     | 33 p                         | 1a                 | 0.765     |
| 134                | 33 p                         | 1a                 | 0.634     | 33 p                         | 1a                 | 0.742     |
| 135                | 33 p                         | 1a                 | 0.809     | 33 p                         | 1a                 | 0.739     |
| 136                | 33 p                         | 1a                 | 0.807     | 33 p                         | 1a                 | 0.871     |
| 137                | 33 p                         | 1a                 | 0.919     | 33 p                         | 1a                 | 0.847     |
| 138                | 33 p                         | &a                 | 0.956     | 33 p                         | 1a                 | 0.534     |
| 139                | 33 p                         | 1a                 | 0.804     | 33 p                         | 1a                 | 0.790     |
| 140                | 33 p                         | 1a                 | 0.934     | 33 p                         | 1a                 | 0.872     |
| 141                | 33 t                         | 1e                 | 0.010     | 32 t                         | !!                 | 0.00      |
| 142                | 33 m                         | !!                 | 0.00      | 23 p                         | !!                 | 0.00      |
| 143                | 33 p                         | 1a                 | 0.180     | 33 p                         | 1a                 | 0.935     |

|     |         |    |       |      |    |       |
|-----|---------|----|-------|------|----|-------|
| 144 | 33 p    | 1a | 0.802 | 33 p | 1a | 0.727 |
| 145 | 33 p    | 1a | 0.900 | 33 p | 1a | 0.898 |
| 146 | 33 p    | 1a | 0.745 | 33 p | 1a | 0.943 |
| 147 | 33 p    | 1a | 0.868 | 33 p | 1a | 0.924 |
| 148 | 33 p    | 1a | 0.899 | 33 p | 1a | 0.759 |
| 149 | 33 p    | 1a | 0.964 | 33 p | 1a | 0.959 |
| 150 | Triaged | !! | 0.00  | 32 p | 1[ | 0.908 |
| 151 | Triaged | !! | 0.00  | 23 p | 6g | 0.086 |
| 152 | 33 p    | 1m | 0.566 | 32 p | 1[ | 0.457 |
| 153 | Triaged | !! | 0.00  | 23 p | 0a | 0.750 |
| 154 | 33 p    | 1a | 0.830 | 33 p | 1a | 0.875 |
| 155 | 33 p    | !! | 0.00  | 32 p | 5p | 0.010 |
| 156 | Triaged | !! | 0.00  | 23 p | 4g | 0.456 |
| 157 | 33 p    | 1a | 0.565 | 33 p | 1a | 0.909 |
| 158 | 33 t    | !! | 0.00  | 33 t | !! | 0.00  |
| 159 | 33 p    | 1a | 0.921 | 33 p | 1a | 0.835 |
| 160 | 33 p    | 1a | 0.913 | 33 p | 1a | 0.830 |
| 161 | 33 p    | 1a | 0.789 | 33 p | 1a | 0.830 |
| 162 | 33 p    | 1a | 0.494 | 32 p | 1b | 0.535 |
| 163 | Triaged | !! | 0.00  | 22 m | 2o | 0.423 |
| 164 | Triaged | !! | 0.00  | 22 p | 6p | 0.414 |
| 165 | Triaged | !! | 0.00  | 23 p | 2a | 0.576 |
| 166 | 33 p    | 1a | 0.395 | 33 p | 1a | 0.546 |
| 167 | 33 t    | !! | 0.00  | 32 t | !! | 0.00  |
| 168 | 33 t    | 1c | 0.013 | 23 t | 4n | 0.177 |
| 169 | 33 p    | 1a | 0.419 | 33 p | 1a | 0.883 |
| 170 | 33 p    | 1a | 0.310 | 33 p | 1a | 0.120 |
| 171 | 33 p    | 1a | 0.609 | 33 p | 1a | 0.834 |
| 172 | 33 p    | 1a | 0.587 | 33 p | 1a | 0.907 |

#### S4 Metal ion coordination distances in 1VC7 and 4PRF

Table S3: The distances of the metal ion ( $Sr^{2+}$ ) from the neighboring oxygen atoms are given (in Å) in the original (PDB ID: 1VC7) and the rebuilt (PDB ID: 4PRF) C75U-inhibited structures of the HDV ribozyme.

| Atom Name          | PDB ID: 1VC7 (Original) | PDB ID: 4PRF (Rebuilt) |
|--------------------|-------------------------|------------------------|
| O4 of U75          | 2.438                   | 2.388                  |
| O2 of U20          | 3.13                    | 3.086                  |
| OP1 of U23         | 4.16                    | 3.624                  |
| OP2 of C22         | 5.076                   | 4.981                  |
| O6 of G25          | 4.886 (facing away)     | 4.128                  |
| OP2 (pro-Rp) of G1 | 3.891                   | 4.22                   |
| OP2 of U -1        | 5.221                   | 6.227                  |
| O5' of G1          | 5.328                   | 6.267 (facing away)    |
